# Supplementary material
Source: Elsevier journal article supplement (https://www.sciencedirect.com/science/article/pii/S1134009618301086)
Supplement: mmc1 [file S1134009618301086:mmc1.docx]

Anexo


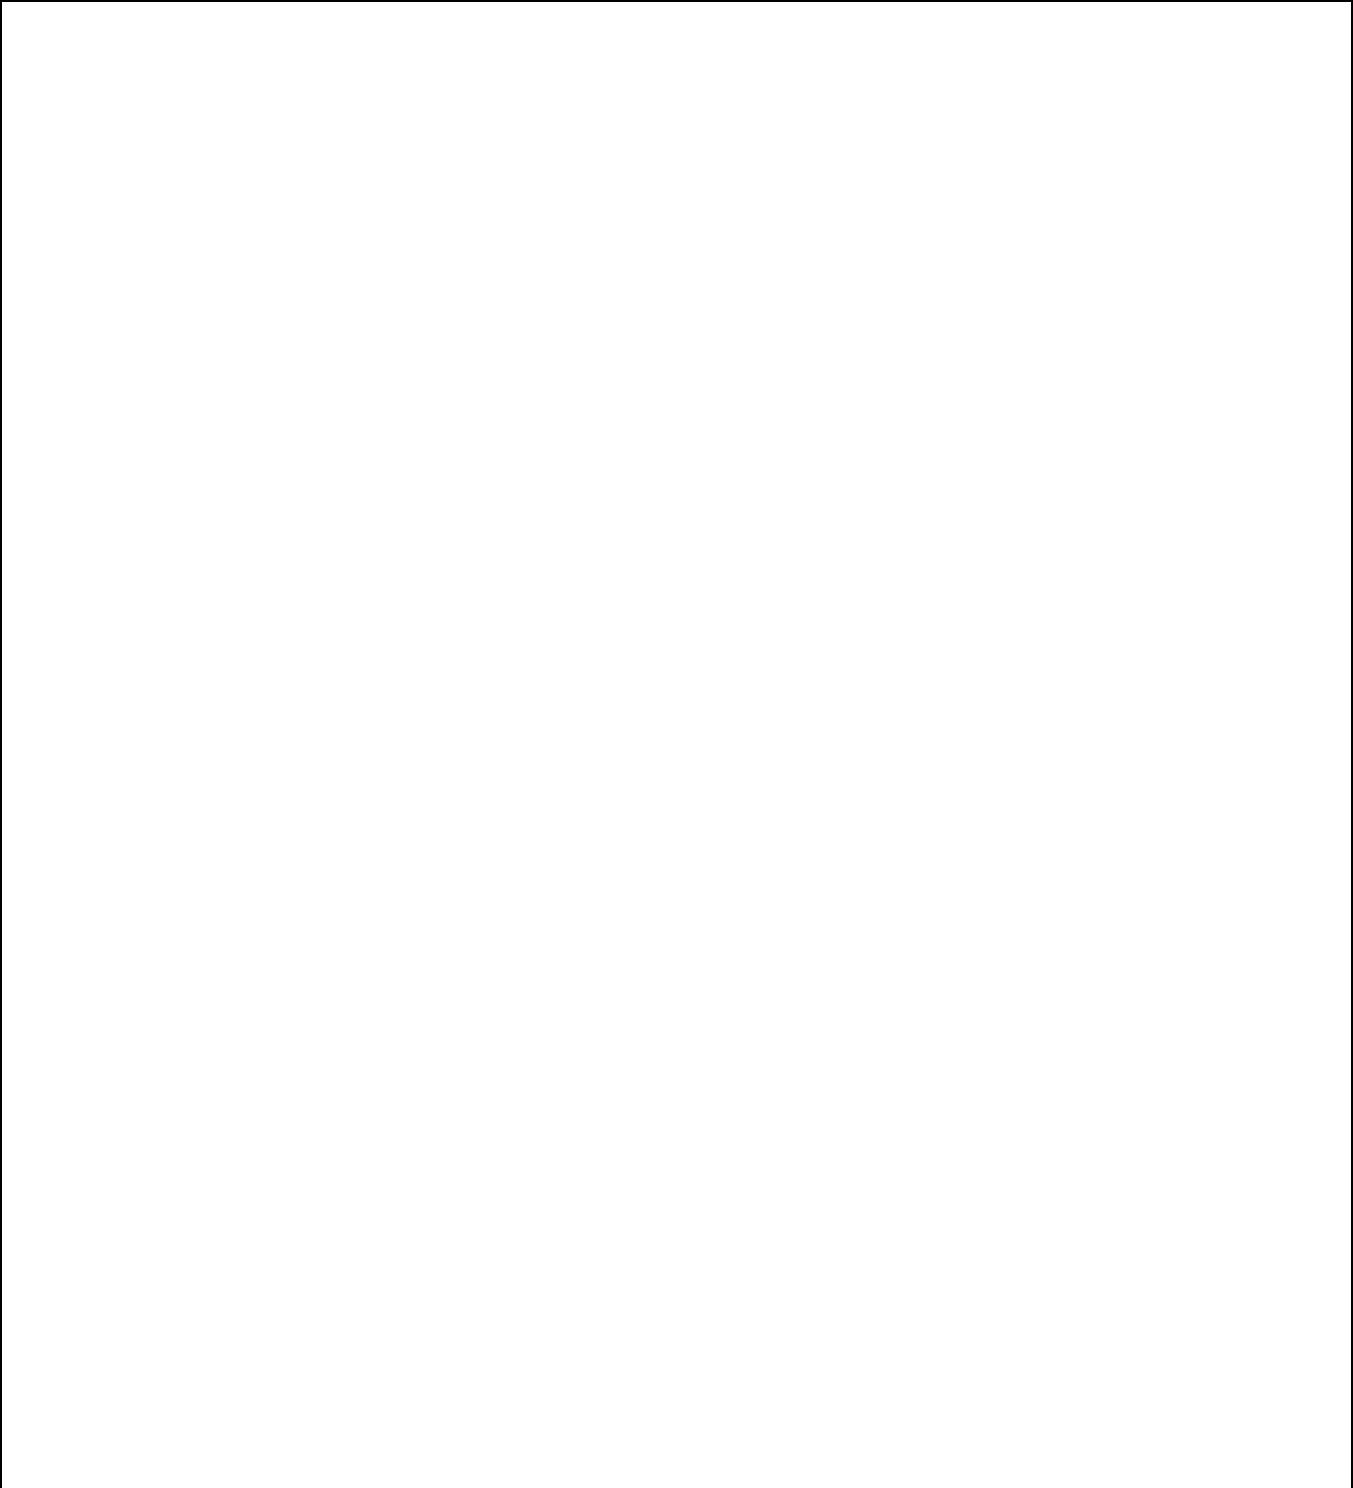


Tabla de material quirúrgico

|  |  | Referencia |
| --- | --- | --- |
|  |  |  |
| Catéter |  |  |
|  |  |  |
| Amplatz AL1 Coronary catheter | Boston | 1639196 |
|  |  |  |
| Amplatz AL2 Coronary catheter | Boston | 1639198 |
|  |  |  |
| Pig-Tail centimetrado | Cook Aurous™ | N5.0-35-100-P-10S-PIG-CSC-20 |
|  |  |  |
| Pig-Tail | Boston | 1639198 |
|  |  |  |
| Guías |  |  |
|  |  |  |
| Guía Curva Teflonada de .035 y | Medtronic Exchange guidewire | 008631 |
| 260cm |  |  |
|  |  |  |
| Guía Recta Teflonada de .035 y | Cordis Emerald™ guidewire | 502-581 |
| 260cm |  |  |
|  |  |  |
| Guía Terumo hidrofílica |  | GS35263M |
|  |  |  |
| Guía Rígida preformada | Boston Safari2™ small | H74939406X |
|  |  |  |
| Introductores |  |  |
|  |  |  |
| Gore DrySeal™ de 14F |  | DSF 1433 |
|  |  |  |
| Gore DrySeal™ de 18F |  | DSF 1833 |
|  |  |  |
| Gore DrySeal™ de 20F |  | DSF 2033 |
|  |  |  |
| Balon de dilatación |  |  |
|  |  |  |
| NuMed Nucleus™ de 18F |  | PNV229 |
|  |  |  |
| NuMed Nucleus™ de 20F |  | PNV230 |
|  |  |  |
| NuMed Nucleus™ de 22F |  | PNV231 |
|  |  |  |
| NuMed Nucleus™ de 25F |  | PNV232 |
|  |  |  |
